# Supplementary material for: Type of underwear worn and markers of testicular function among men attending a fertility center
Source: Oxford University Press journal article supplement (doi:10.1093/humrep/dey259), 2018-07-14
Supplement: dey259suppl_figure1.pdf [file dey259suppl_figure1.pdf]

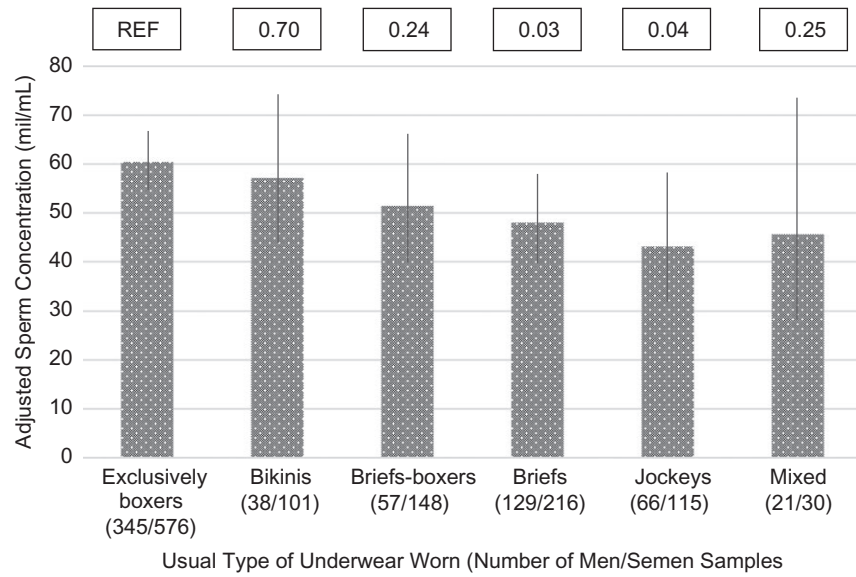

**Supplementary Figure S1** Sperm concentration (mil/mL) among men at a fertility center who reported wearing most frequently boxers compared to men who reported usually wearing other type of underwear (656 men contributing 1186 semen samples). Data are presented as predicted marginal means (95% CI) adjusted for age (continuous), BMI (continuous), smoking status (ever and never smoked), abstinence time (continuous) and year of semen sample collection (continuous). Small boxes report the *P*-value comparing men who wear that type of underwear with men who wear exclusively boxers.
