# Supplementary material for: Type of underwear worn and markers of testicular function among men attending a fertility center
Source: Oxford University Press journal article supplement (doi:10.1093/humrep/dey259), 2018-07-14
Supplement: dey259suppl_table1.pdf [file dey259suppl_table1.pdf]

**Supplementary Table SI** Distribution of semen quality, reproductive hormones and sperm DNA integrity parameters among men attending a fertility center.

|                                           | <b>N (samples)</b> | <b>25th Percentile</b> | <b>50th Percentile</b> | <b>75th Percentile</b> |
|-------------------------------------------|--------------------|------------------------|------------------------|------------------------|
| Semen parameters                          |                    |                        |                        |                        |
| Ejaculate volume (mL)                     | 1186               | 1.90                   | 2.80                   | 3.80                   |
| Sperm concentration (mil/mL)              | 1186               | 28.2                   | 62.2                   | 113                    |
| Total sperm count (mil)                   | 1186               | 71.4                   | 156                    | 298                    |
| Total motility (%)                        | 1186               | 30.0                   | 49.0                   | 66.0                   |
| Total motile count (mil/ejaculate)        | 1186               | 22.3                   | 75.0                   | 170                    |
| Normal morphology (%)                     | 1090               | 4.00                   | 6.0                    | 9.0                    |
| Normal morphology count (mil/ejaculate)   | 1090               | 3.22                   | 9.2                    | 22.3                   |
| Reproductive hormones                     |                    |                        |                        |                        |
| FSH (IU/L)                                | 304                | 5.53                   | 7.29                   | 10.2                   |
| LH (IU/L)                                 | 304                | 7.21                   | 9.67                   | 13.2                   |
| Total testosterone (ng/dL)                | 304                | 326                    | 400                    | 482                    |
| Prolactin (ng/mL)                         | 304                | 8.38                   | 11.6                   | 16.1                   |
| Estradiol (pg/mL)                         | 304                | 22.0                   | 29.0                   | 36.0                   |
| SHBG (nmol/mL)                            | 304                | 20.0                   | 25.8                   | 33.6                   |
| Inhibin B (pg/mL)                         | 304                | 127                    | 170                    | 207                    |
| Sperm DNA fragmentation                   |                    |                        |                        |                        |
| Comet extent ( $\mu\text{m}$ )            | 293                | 106                    | 128                    | 154                    |
| Tail distributed moment ( $\mu\text{m}$ ) | 293                | 20.6                   | 28.4                   | 43.5                   |
| Percentage DNA in tail (%)                | 293                | 47.5                   | 55.6                   | 66.8                   |
| Cells with high DNA damage ( <i>n</i> )   | 293                | 0                      | 4                      | 10                     |
