# Supplementary material for: Type of underwear worn and markers of testicular function among men attending a fertility center
Source: Oxford University Press journal article supplement (doi:10.1093/humrep/dey259), 2018-07-14
Supplement: dey259suppl_table2.pdf [file dey259suppl_table2.pdf]

**Supplementary Table SII Sperm DNA damage parameters<sup>a</sup> among men at a fertility center who reported most frequently wearing boxers (156 men, 156 semen samples) compared to men who did not (137 men, 137 semen samples).**

| Type of underwear            | Comet extent (μm) | Tail distributed moment (μm) | Percentage DNA in tail (%) | Cells with high DNA damage (n) |
|------------------------------|-------------------|------------------------------|----------------------------|--------------------------------|
| Unadjusted                   |                   |                              |                            |                                |
| Primarily wearing boxers     | 128 (122, 135)    | 32.5 (30.2, 34.9)            | 56.6 (54.3, 58.9)          | 7.5 (7.1, 8.0)                 |
| Not primarily wearing boxers | 134 (128, 141)    | 32.8 (30.2, 35.3)            | 57.7 (55.2, 60.1)          | 8.5 (8.0, 9.0)                 |
| P-value                      | 0.23              | 0.90                         | 0.53                       | 0.005                          |
| Adjusted <sup>b</sup>        |                   |                              |                            |                                |
| Primarily wearing boxers     | 128 (122, 135)    | 32.2 (30.3, 34.0)            | 56.7 (54.4, 59.0)          | 7.6 (7.2, 8.1)                 |
| Not primarily wearing boxers | 134 (127, 141)    | 33.2 (31.3, 35.1)            | 57.5 (55.1, 60.0)          | 7.9 (7.4, 8.4)                 |
| P-value                      | 0.28              | 0.44                         | 0.64                       | 0.44                           |

<sup>a</sup>Data are presented as predicted marginal means (95% CI).

<sup>b</sup>Models are adjusted for age (continuous), BMI (continuous), smoking status (ever and never smoked), abstinence time (continuous) and year of semen sample collection (continuous).
