# Supplementary material for: Type of underwear worn and markers of testicular function among men attending a fertility center
Source: Oxford University Press journal article supplement (doi:10.1093/humrep/dey259), 2018-07-14
Supplement: dey259suppl_table4.pdf [file dey259suppl_table4.pdf]

**Supplementary Table SIV** Sensitivity analyses for reproductive hormone concentrations<sup>a</sup> among men at a fertility center who reported most frequently wearing boxers compared to men who did not.

| Type of underwear                                     | FSH (IU/L)        | LH (IU/L)         | Testosterone (ng/dL) | Prolactin (ng/mL) | Estradiol (pg/mL) | SHBG (nmol/mL)    | Inhibin B (pg/mL) |
|-------------------------------------------------------|-------------------|-------------------|----------------------|-------------------|-------------------|-------------------|-------------------|
| Adjusted <sup>b</sup>                                 |                   |                   |                      |                   |                   |                   |                   |
| Primarily wearing boxers                              | 7.21 (6.69, 7.78) | 9.57 (8.93, 10.2) | 413 (394, 432)       | 11.5 (10.8, 12.3) | 29.2 (27.4, 30.9) | 24.6 (23.2, 26.0) | 180 (168, 191)    |
| Not primarily wearing boxers                          | 8.20 (7.55, 8.91) | 9.91 (9.19, 10.7) | 422 (402, 443)       | 12.0 (11.2, 12.9) | 28.2 (26.3, 30.1) | 26.7 (24.8, 28.1) | 167 (155, 180)    |
| P-value                                               | 0.03              | 0.50              | 0.49                 | 0.38              | 0.48              | 0.09              | 0.16              |
| Adjusted <sup>b</sup> + history of varicocele         |                   |                   |                      |                   |                   |                   |                   |
| Primarily wearing boxers                              | 7.24 (6.58, 7.96) | 10.1 (9.24, 11.0) | 421 (397, 445)       | 11.3 (10.4, 12.2) | 30.9 (28.7, 33.0) | 24.5 (22.9, 26.3) | 163 (152, 175)    |
| Not primarily wearing boxers                          | 8.18 (7.40, 9.05) | 10.4 (9.5, 11.4)  | 434 (410, 459)       | 12.5 (11.5, 13.6) | 30.7 (28.4, 32.9) | 26.2 (24.4, 28.2) | 152 (140, 164)    |
| P-value                                               | 0.08              | 0.60              | 0.44                 | 0.10              | 0.89              | 0.20              | 0.19              |
| Adjusted <sup>b</sup> + hot bath/jacuzzi              |                   |                   |                      |                   |                   |                   |                   |
| Primarily wearing boxers                              | 7.21 (6.69, 7.78) | 9.57 (8.93, 10.2) | 413 (394, 431)       | 11.5 (10.8, 12.3) | 29.2 (27.4, 30.9) | 24.6 (23.2, 26.0) | 180 (168, 191)    |
| Not primarily wearing boxers                          | 8.20 (7.55, 8.91) | 9.91 (9.19, 10.7) | 422 (402, 443)       | 12.0 (11.2, 12.9) | 28.2 (26.3, 30.1) | 26.4 (24.8, 28.0) | 167 (155, 180)    |
| P-value                                               | 0.03              | 0.50              | 0.49                 | 0.38              | 0.48              | 0.09              | 0.17              |
| Adjusted <sup>b</sup> , restricted first semen sample |                   |                   |                      |                   |                   |                   |                   |
| Primarily wearing boxers                              | 7.21 (6.69, 7.78) | 9.57 (8.93, 10.2) | 413 (394, 432)       | 11.5 (10.8, 12.3) | 29.2 (27.4, 30.9) | 24.6 (23.2, 26.0) | 180 (168, 191)    |
| Not primarily wearing boxers                          | 8.20 (7.55, 8.91) | 9.91 (9.19, 10.7) | 422 (402, 443)       | 12.0 (11.2, 12.9) | 28.2 (26.3, 30.1) | 26.7 (24.8, 28.1) | 167 (155, 180)    |
| P-value                                               | 0.03              | 0.50              | 0.49                 | 0.38              | 0.48              | 0.09              | 0.16              |

<sup>a</sup>Data are presented as predicted marginal means (95% CI).

<sup>b</sup>Models are adjusted for age (continuous), BMI (continuous), smoking status (ever and never smoked), time to blood sampling (continuous) and year of serum sample collection (continuous). SHBG, sex hormone-binding globulin.
